# Supplementary material for: A Synergistic effect on the atomic cluster M4 supported on MN4-graphene (M = Fe, Ni) for the hydrogen evolution reaction
Source: Royal Society of Chemistry journal article supplement (doi:10.1039/d2cp00644h), 2022-01-01

# **Synergy Effect on Atomic Cluster $M_4$ Supported on $MN_4$ - Graphene ( $M=Fe, Ni$ ) for Hydrogen Evolution Reaction**

Jiake Cui<sup>1</sup>, Xiaojing Liu<sup>1</sup>, Yongxue Wei<sup>1</sup>, Xiangjian Shen\*

<sup>1</sup> Engineering Research Center of Advanced Functional Material Manufacturing of Ministry of Education, Zhengzhou University, Zhengzhou 450001, China,

\* To whom correspondence should be addressed: [xjshen85@zzu.edu.cn](mailto:xjshen85@zzu.edu.cn)

## Table of content

**Table S1:** Binding energies between tetrahedral  $M_4$  clusters and  $MN_4$ -Gr substrates in different configurations.

**Table S2:** Binding energies of  $M_4$  clusters in a planar form supported on  $MN_4$ -Gr substrates.

**Table S3:** Bader charge (BC) of each metal atom and N atom of  $M_4@MN_4$ -Gr model catalysts.

**Figure S1:** The optimized stable structures of the substrates and metal clusters.

**Figure S2:** Three basic configurations of optimized  $M_4@MN_4$ -Gr model catalysts.

**Figure S3:** Final configurations of planar  $M_4$  clusters initially bounded to  $MN_4$ -Gr substrates.

**Figure S4:** Schematic diagram of metal and N atoms labelling.

**Figure S5:** Schematic illustration of different adsorption sites on  $M_4$  clusters supported on  $MN_4$ -Gr substrates.

**Figure S6:** The Gibbs free energies of hydrogen adsorption ( $\Delta G_{H^*}$ ) in implicit solvation model.

**Figure S7:** Configuration diagrams of the HER mechanism on four model catalysts.

**Figure S8:** The free energy diagrams of HER in implicit solvation model.

**Figure S9:** Configuration diagram of two hydrogen atoms adsorbed on the  $M_4@MN_4$ -Gr catalyst.

**Table S1:** The binding energies between tetrahedral  $M_4$  clusters and  $MN_4$ -Gr substrates in different configurations, including Regular-Tetrahedron (RT), Side-Tetrahedron (ST) and Inverted-Tetrahedron (IT), respectively.

| Catalyst      | $E_b$ /(eV) |       |       |
|---------------|-------------|-------|-------|
|               | RT          | ST    | IT    |
| $Fe_4FeN_4Gr$ | 2.352       | 2.233 | 1.158 |
| $Fe_4NiN_4Gr$ | 1.292       | 1.275 | 1.259 |
| $Ni_4FeN_4Gr$ | 2.491       | 2.306 | 2.315 |
| $Ni_4NiN_4Gr$ | 1.75        | 1.590 | 1.590 |

**Table S2:** Binding energies of  $M_4$  clusters in a planar form supported on  $MN_4$ -Gr substrates.

| Catalyst             | $E_b$ /(eV) |
|----------------------|-------------|
| Flat- $Fe_4@FeN_4Gr$ | 2.255       |
| Flat- $Fe_4@NiN_4Gr$ | 0.845       |
| Flat- $Ni_4@FeN_4Gr$ | 1.603       |
| Flat- $Ni_4@NiN_4Gr$ | 0.815       |

**Table S3:** Bader charge (BC) of each metal atom and N atom of  $M_4@MN_4$ -Gr model catalysts.

| $Fe_4@FeN_4$ -Gr |         | $Fe_4@NiN_4$ -Gr |         | $Ni_4@FeN_4$ -Gr |         | $Ni_4@NiN_4$ -Gr |         |
|------------------|---------|------------------|---------|------------------|---------|------------------|---------|
| Element          | BC( e ) |
| Fe1              | -0.76   | Ni1              | -0.71   | Fe1              | -0.88   | Ni1              | -0.75   |
| Fe2              | -0.35   | Fe1              | -0.32   | Ni1              | -0.24   | Ni2              | -0.27   |
| Fe3              | 0.08    | Fe2              | 0.06    | Ni2              | -0.22   | Ni3              | -0.22   |
| Fe4              | -0.34   | Fe3              | -0.32   | Ni3              | 0.11    | Ni4              | 0.11    |
| Fe5              | -0.34   | Fe4              | -0.32   | Ni4              | -0.23   | Ni5              | -0.23   |
| N1               | 1.19    | N1               | 1.2     | N1               | 1.18    | N1               | 1.18    |
| N2               | 1.13    | N2               | 1.22    | N2               | 1.11    | N2               | 1.19    |
| N3               | 1.21    | N3               | 1.24    | N3               | 1.18    | N3               | 1.22    |
| N4               | 1.13    | N4               | 1.04    | N4               | 1.18    | N4               | 1.07    |

**Figure S1:** The optimized stable structures of the substrates and metal clusters, (a)  $FeN_4$ -Gr, (b)  $NiN_4$ -Gr, (c)  $Fe_4$  cluster, (d)  $Ni_4$  cluster.

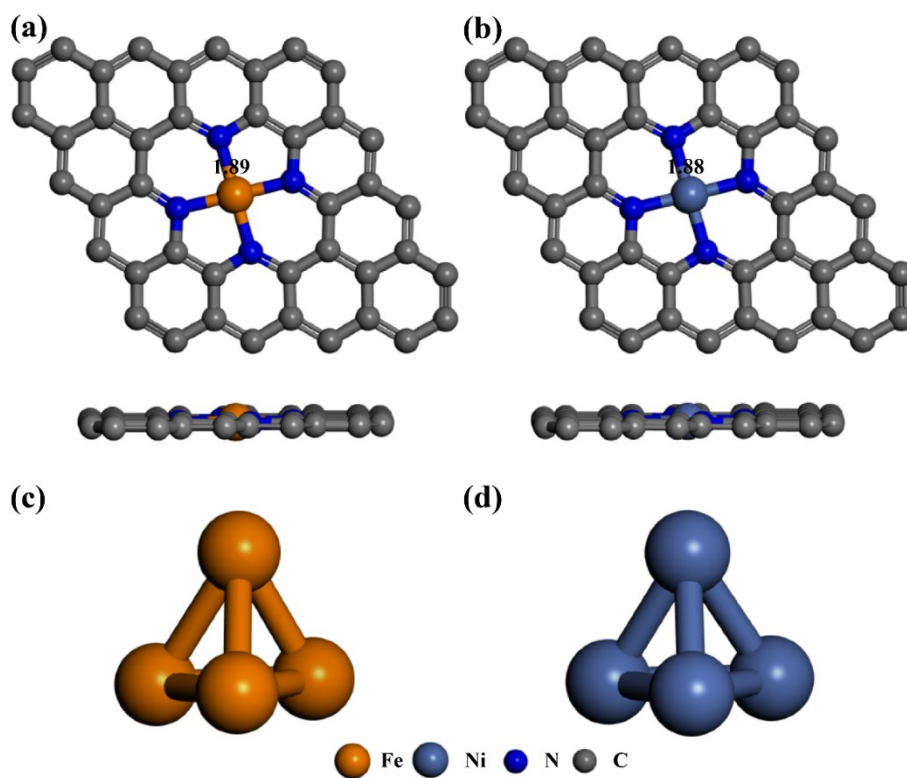

**Figure S2:** Three basic configurations of optimized  $M_4@MN_4$ -Gr model catalysts: Regular-Tetrahedron (RT), Side-Tetrahedron (ST) and Inverted-Tetrahedron (IT).

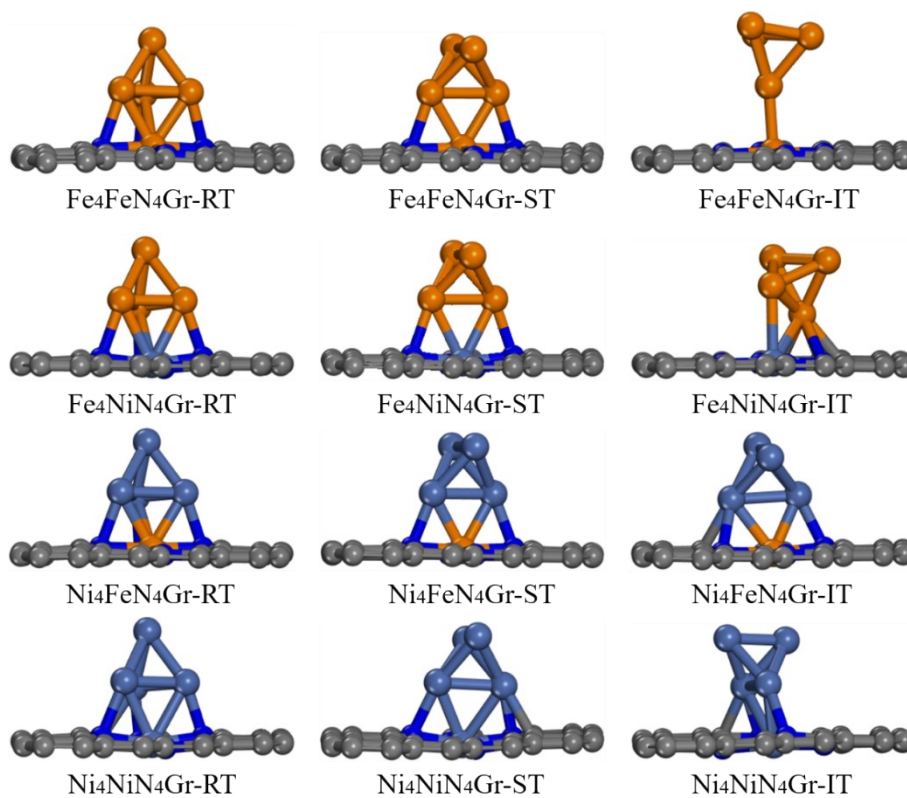

It can be clearly seen from Figure S2 and Table S1 that the Regular-Tetrahedron is the

most stable in the three configurations, while the Inverted-Tetrahedron tends to be deformed. In the Inverted-Tetrahedron configuration, one vertex atom of the  $M_4$  cluster interacts with the substrate, and the other three atoms are far away from the substrate, which is unstable. When more metal atoms in the  $M_4$  cluster interact with the substrate like Side-Tetrahedron and Regular-Tetrahedron configurations, there will be more electron transfer between the cluster and the substrate, which will make the  $M_4$  cluster stably bind to the  $MN_4$ -Gr substrate.

**Figure S3:** Final configurations of planar  $M_4$  clusters initially bounded to  $MN_4$ -Gr substrates. (a)-(d) are shown for  $Fe_4@FeN_4Gr$ ,  $Fe_4@NiN_4Gr$ ,  $Ni_4@FeN_4Gr$  and  $Ni_4@NiN_4Gr$ , respectively.

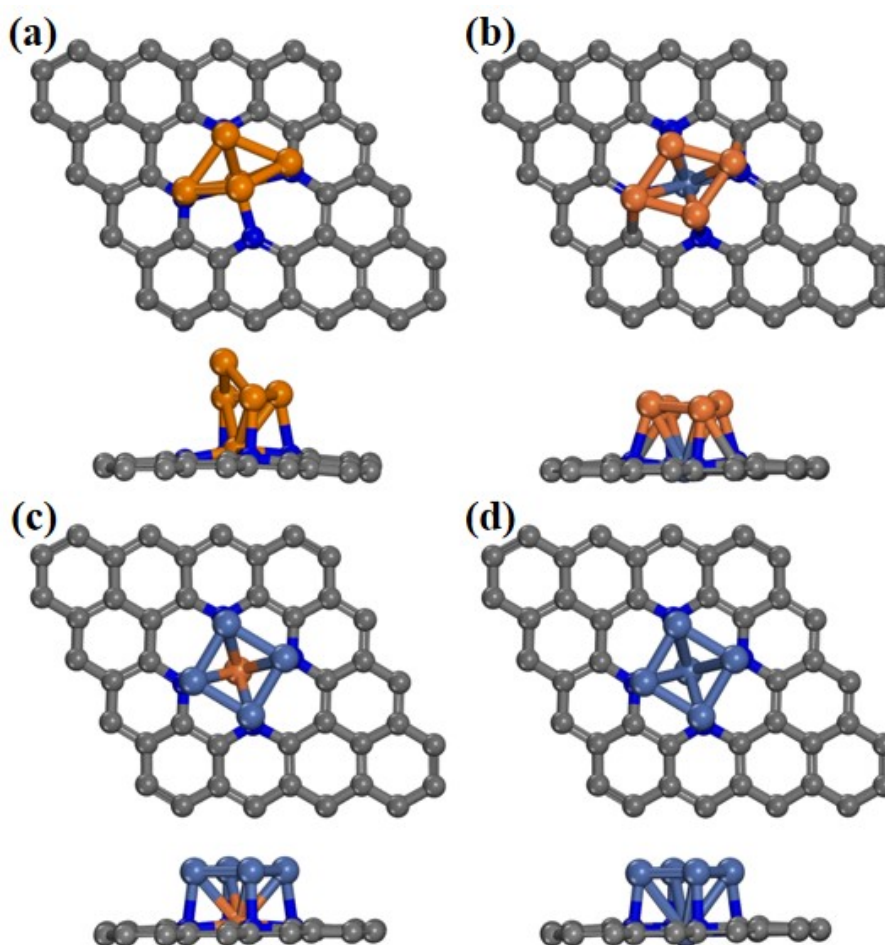

**Figure S4:** Schematic diagram of metal and N atoms labelling: (a)-(d) are shown for  $Fe_4FeN_4Gr$ ,  $Fe_4NiN_4Gr$ ,  $Ni_4FeN_4Gr$  and  $Ni_4NiN_4Gr$ , respectively.

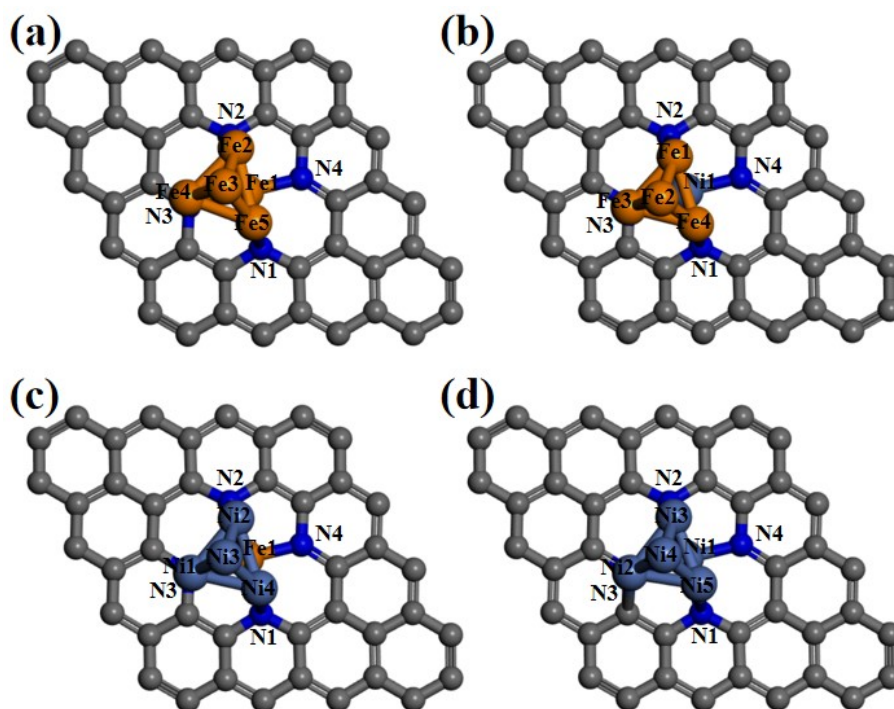

**Figure S5:** Schematic illustration of different adsorption sites on  $M_4$  clusters supported on  $MN_4$ -Gr substrates.

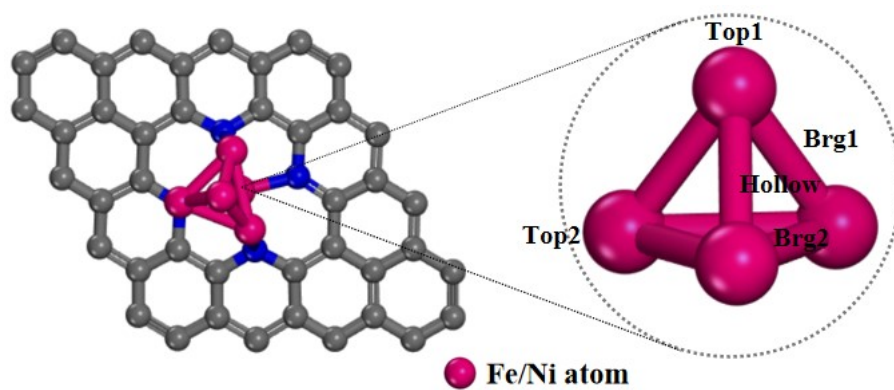

**Figure S6:** The Gibbs free energies of hydrogen adsorption ( $\Delta G_{H^*}$ ) in implicit solvation model.

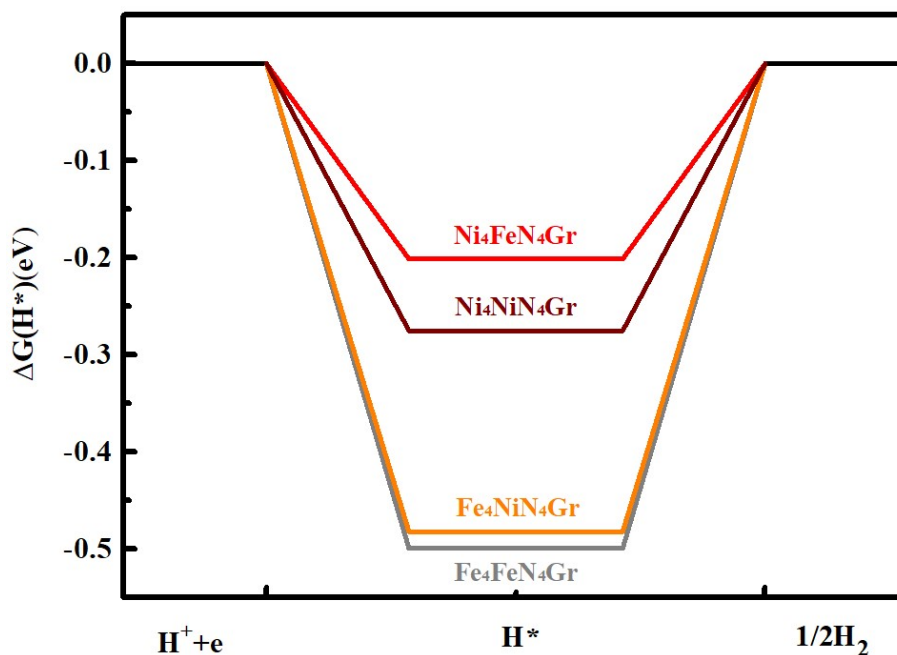

**Figure S7:** Configuration diagrams of the HER mechanism on four model catalysts. (a)-(d) are  $\text{Fe}_4\text{FeN}_4\text{Gr}$ ,  $\text{Fe}_4\text{NiN}_4\text{Gr}$ ,  $\text{Ni}_4\text{FeN}_4\text{Gr}$  and  $\text{Ni}_4\text{NiN}_4\text{Gr}$ , respectively,

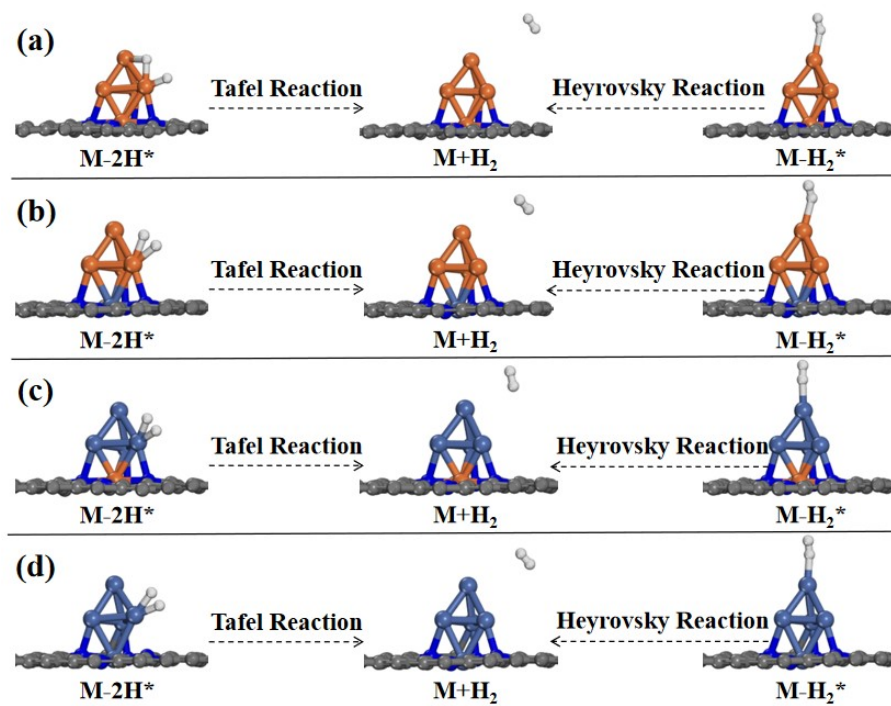

**Figure S8:** The free energy diagrams of HER in implicit solvation model, following the Volmer-Heyrovsky pathway (dotted lines) and Volmer-Tafel pathway (solid lines) on various model catalysts.

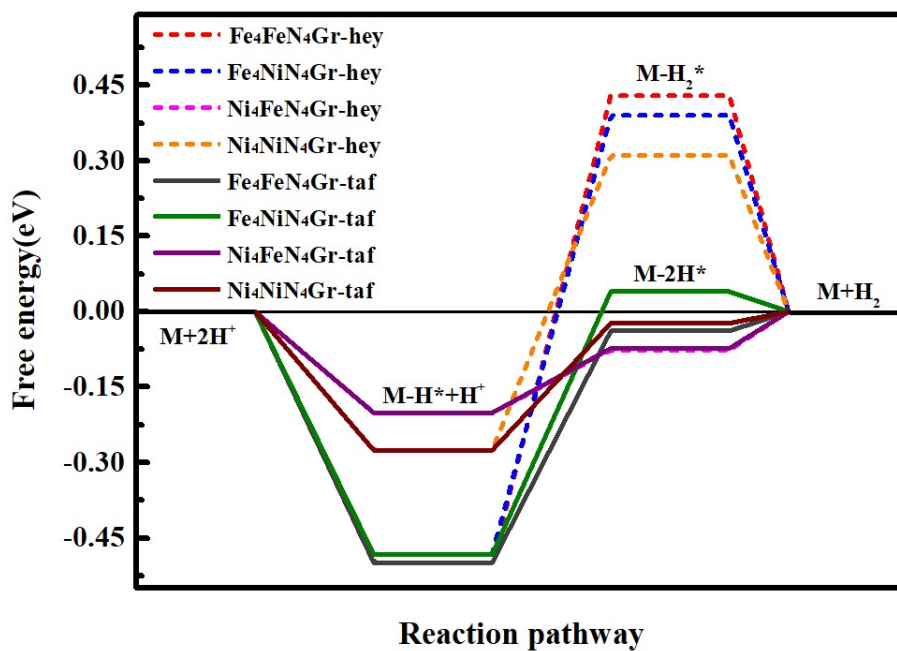

**Figure S9:** Configuration diagram of two hydrogen atoms adsorbed on the  $M_4@MN_4$ -Gr catalyst.

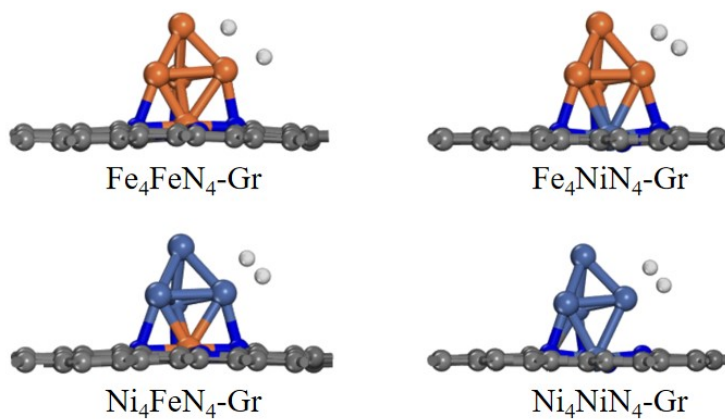

Supplement: d2cp00644h1.pdf [file d2cp00644h1.pdf]
